# Supplementary material
Source: PubMed Central journal article supplement (PMC8035376)

Ambio

Electronic Supplementary Material

*This supplementary material has not been peer reviewed.*

**Title: Strictly protected areas are not necessarily more effective than areas in which multiple human uses are allowed**

Authors: Moses Elleason, Zhuoli Guan, Yiming Deng, Aiwu Jiang, Eben Goodale, Christos Mammides

## Table of Contents

|                                                                                                                                                                                                                                                                                                                                                                                                                                                                                                                            |    |
|----------------------------------------------------------------------------------------------------------------------------------------------------------------------------------------------------------------------------------------------------------------------------------------------------------------------------------------------------------------------------------------------------------------------------------------------------------------------------------------------------------------------------|----|
| <i>Table S1. List of studies included in the literature review</i> .....                                                                                                                                                                                                                                                                                                                                                                                                                                                   | 3  |
| <i>Table S2. Mean values for each of the confounding variables included in the analysis. NC = protected areas with no IUCN category</i> .....                                                                                                                                                                                                                                                                                                                                                                              | 11 |
| <i>Table S3. Results of the generalized boosted models, comparing strictly protected areas (Categories I-VI) to: (a) areas in which multiple human uses are allowed (Categories V-VI) and, (b) areas with no IUCN category (NC). HFI = Human footprint index; LFC = Loss in forest cover (%)</i> .....                                                                                                                                                                                                                     | 13 |
| <i>Table S4. Results of the generalized boosted models when the alternative method was used to classify strictly protected areas (Categories I-II) and multiple-use areas (Categories III-VI). NC = areas with no IUCN Category; HFI = Human footprint index; LFC = Loss in forest cover (%)</i> .....                                                                                                                                                                                                                     | 14 |
| <i>Table S5. Results of the matching analysis comparing strictly protected areas to areas in which multiple human used are allowed. Comparisons were made using the Wilcoxon rank test. The total number of protected areas (PAs) and the number of matched areas are also shown.</i> .....                                                                                                                                                                                                                                | 15 |
| <i>Figure S1. Differences in the change in human footprint between strictly protected areas (1) and matched areas in which multiple human uses are permitted (0). Strictly protected areas represent Categories I-VI and multiple-use areas represent Categories V-VI. Negative numbers indicate a decrease in human footprint.</i> ..                                                                                                                                                                                     | 16 |
| <i>Figure S2. Differences in the change in human footprint between strictly protected areas (1) and matched areas in which multiple human uses are permitted (0). Strictly protected areas represent Categories I-II and multiple-use areas represent Categories III-VI. Negative numbers indicate a decrease in human footprint.</i> .                                                                                                                                                                                    | 17 |
| <i>Figure S3. Differences in forest cover loss (%) between strictly protected areas (1) and matched areas in which multiple human uses are permitted (0). Strictly protected areas represent Categories I-IV and multiple-use areas represent Categories V-VI.</i> .....                                                                                                                                                                                                                                                   | 18 |
| <i>Figure S4. Differences in forest cover loss (%) between strictly protected areas (1) and matched areas in which multiple human uses are permitted (0). Strictly protected areas represent Categories I-II and multiple-use areas represent Categories III-VI.</i> .....                                                                                                                                                                                                                                                 | 19 |
| <i>Figure S5. The resulting balance when generalized boosted models were used to compare the three types of protected areas, using the human footprint index and by grouping protected areas as follows: strictly protected = Categories I-IV, multiple-use = Categories V-VI. Unweighted values represent the differences between the treatment groups, for each of the confounding variables, based on the raw data. Solid circles indicate that differences were statistically significant at the 0.05 level.</i> ..... | 20 |
| <i>Figure S6. The resulting balance when generalized boosted models were used to compare the three types of protected areas, using the human footprint index and by grouping protected areas as follows: strictly protected = Categories I-II, multiple-use = Categories III-VI</i> .....                                                                                                                                                                                                                                  | 21 |

Figure S7. The resulting balance when generalized boosted models were used to compare the three types of protected areas, using the loss in forest cover (%) and by grouping protected areas as follows: strictly protected = Categories I-IV, multiple-use = Categories V-VI. .... 22

Figure S8. The resulting balance when generalized boosted models were used to compare the three types of protected areas, using the loss in forest cover (%) and by grouping protected areas as follows: strictly protected = Categories I-II, multiple-use = Categories III-VI. .... 23

Figure S9. The resulting balance when matching was used to compare the protected areas, using the human footprint index and by grouping protected areas as follows: strictly protected = Categories I-IV, multiple-use = Categories V-VI. .... 24

Figure S10. The resulting balance when matching was used to compare the protected areas, using the human footprint index and by grouping protected areas as follows: strictly protected = Categories I-II, multiple-use = Categories III-VI. .... 25

Figure S11. The resulting balance when matching was used to compare the protected areas, using the loss in forest cover (%) and by grouping protected areas as follows: strictly protected = Categories I-IV, multiple-use = Categories V-VI. .... 26

Figure S12. The resulting balance when matching was used to compare the protected areas, using the loss in forest cover (%) and by grouping protected areas as follows: strictly protected = Categories I-II, multiple-use = Categories III-VI. .... 27

Table S1. List of studies included in the literature review

| Year | Study region                                                                                    | Index used                                                       | IUCN Categories                                              | Conclusions                                                                                                                                                                        | Reference |
|------|-------------------------------------------------------------------------------------------------|------------------------------------------------------------------|--------------------------------------------------------------|------------------------------------------------------------------------------------------------------------------------------------------------------------------------------------|-----------|
| 2008 | Global (Amazon forest, South American Atlantic coast forest, Congo forest, West African forest) | Natural vegetation                                               | Strict: I-IV<br>Non-strict: V-VI                             | Levels of natural vegetation were similar in both types of PAs (except in the West African forest in which natural vegetation was higher in categories I-IV compared to V and VI). | [1]       |
| 2010 | Global                                                                                          | Human footprint index (used as a proxy of naturalness)           | Each IUCN category was analyzed separately                   | The levels of human footprint within each category did not correspond to the expected gradient of naturalness (in a globally consistent manner).                                   | [2]       |
| 2010 | Global (tropical forests)                                                                       | Deforestation and loss in carbon stock                           | Strict: I-II<br>Non-strict: III-VI and PAs with no category  | Strict PAs had lower rates of deforestation and carbon loss.                                                                                                                       | [3]       |
| 2010 | Global                                                                                          | Anthropogenic disturbance (measured using changes in land-cover) | Strict: I-II<br>Non-strict: III-VI                           | Strict PAs were more successful in reducing anthropogenic disturbance (although size was also important).                                                                          | [4]       |
| 2011 | Global                                                                                          | Normalized Difference Vegetation Index (NDVI)                    | Strict: I-III<br>Non-strict: IV-V (Category VI was excluded) | Strict PAs were in more “natural state” (and were becoming increasingly isolated).                                                                                                 | [5]       |
| 2011 | Global (tropical forests)                                                                       | Forest fires (used as a proxy of deforestation rates)            | Strict: I-IV<br>Non-strict: V-VI                             | Non-strict PAs had lower rates of forest fires compared to strict PAs (except in Africa in which there were insufficient data to compare the two types of protected areas).        | [6]       |

| Year | Study region                                      | Index used                                               | IUCN Categories                                              | Conclusions                                                                                                                          | Reference |
|------|---------------------------------------------------|----------------------------------------------------------|--------------------------------------------------------------|--------------------------------------------------------------------------------------------------------------------------------------|-----------|
| 2012 | Global (tropical forests)                         | Deforestation                                            | Strict: I-IV<br>Non-strict: V-VI and<br>PAs with no category | Non-strict PAs had lower (and less variable) deforestation rates compared to strict PAs.                                             | [7]       |
| 2012 | Costa Rica                                        | Forest regrowth                                          | Strict: I, II, and IV<br>Non-strict: VI                      | Levels of forest regrowth did not vary substantially between the two types of protected areas.                                       | [8]       |
| 2012 | Canada                                            | Developed land (i.e., roads, urban areas, and croplands) | Strict: I-IV<br>Non-strict: V-VI                             | Non-strict PAs had more roads and croplands. However, there was no significant difference in urban areas.                            | [9]       |
| 2013 | Global (Bolivia, Costa Rica, Indonesia, Thailand) | Deforestation                                            | Strict: I-IV<br>Non-strict: V-VI                             | Deforestation rates were lower within strict PAs compared to non-strict PAs.                                                         | [10]      |
| 2013 | Spain                                             | Management practices and regulations                     | Each IUCN category was analyzed separately                   | IUCN categories correlated only weakly with management practices and regulations of PAs.                                             | [11]      |
| 2013 | Latin America                                     | Land and forest degradation                              | Strict: I-IV<br>Non-strict: V-VI                             | There was no significant difference between the two categories.                                                                      | [12]      |
| 2014 | Cerrado Biodiversity Hotspot (Brazil)             | Deforestation                                            | Strict: I-IV<br>Non-strict: V-VI                             | Strict PAs were more effective at reducing habitat conversion compared to non-strict PAs.                                            | [13]      |
| 2014 | Brazilian Amazon                                  | Deforestation                                            | Strict: I-IV<br>Non-strict: V-VI                             | Non-strict PAs were more likely to be found in areas with higher deforestation rates and hence more likely to undergo deforestation. | [14]      |
| 2014 | Global                                            | Species richness and abundance of                        | Each IUCN category was analyzed separately                   | There was no clear relationship between the effectiveness of the protected areas and their                                           | [15]      |

| Year | Study region                           | Index used                              | IUCN Categories                                                                                            | Conclusions                                                                                                                             | Reference |
|------|----------------------------------------|-----------------------------------------|------------------------------------------------------------------------------------------------------------|-----------------------------------------------------------------------------------------------------------------------------------------|-----------|
|      |                                        | vertebrates, invertebrates, and plants. |                                                                                                            | IUCN category. However, protected areas had higher biodiversity than areas outside.                                                     |           |
| 2015 | Cerrado Biodiversity Hotspot (Brazil)  | Deforestation                           | Strict: I-III<br>Non-strict: IV-VI                                                                         | Strict PAs were more effective at reducing deforestation rates compared to non-strict PAs                                               | [16]      |
| 2015 | Mexico                                 | Deforestation                           | Strict: I-IV<br>Non-strict: V-VI                                                                           | Non-strict PAs were more effective than strict PAs at reducing deforestation rates (due to the forest concessions).                     | [17]      |
| 2015 | Guatemala                              | Deforestation                           | Strict: I-IV<br>Non-strict: V-VI                                                                           | Non-strict PAs were more effective than strict PAs at reducing deforestation rates (due to the forest concessions).                     | [18]      |
| 2015 | Indonesia                              | Deforestation                           | Each IUCN category was analyzed separately                                                                 | Strict PAs were not necessarily more effective in reducing deforestation. Overall, deforestation was higher within Categories Ia and V. | [19]      |
| 2015 | European Russia                        | Deforestation                           | Strict: Zapovedniks (I)<br>Non-strict: National Parks (II or IV) & Federal Zakazniks (IV or V)             | No substantial differences in the effectiveness of the two types of PAs.                                                                | [20]      |
| 2016 | Carpathian Mountains in Eastern Europe | Deforestation                           | Strict: I-II<br>Non-strict: III-VI                                                                         | Strict PAs were not necessarily more effective than non-strict PAs.                                                                     | [21]      |
| 2016 | Peru (Peruvian Amazon)                 | Deforestation and human disturbance     | Strict: National Parks, National Sanctuaries<br>Non-strict: Reserves in which sustainable use is permitted | Non-strict PAs had lower rates of deforestation and lower levels of human disturbance compared to strict PAs.                           | [22]      |

| Year | Study region                         | Index used                                                                | IUCN Categories                            | Conclusions                                                                                                                                               | Reference |
|------|--------------------------------------|---------------------------------------------------------------------------|--------------------------------------------|-----------------------------------------------------------------------------------------------------------------------------------------------------------|-----------|
| 2016 | Global                               | Species richness and abundance of vertebrates, invertebrates, and plants. | Strict: I-II<br>Non-strict: III-VI         | There was no statistically significant difference between strict and non-strict PAs.                                                                      | [23]      |
| 2016 | Brazil (Atlantic and Amazon forests) | Deforestation                                                             | Strict: I-IV<br>Non-strict: V-VI           | Strict PAs had lower rates of habitat conservation compared to non-strict PAs.                                                                            | [24]      |
| 2017 | Global (tropical forests)            | Deforestation                                                             | Each IUCN category was analyzed separately | Deforestation rates within the various IUCN categories differed substantially across regions.                                                             | [25]      |
| 2018 | Global                               | Human footprint index                                                     | Strict: I-II<br>Non-strict: III-VI         | Strict PAs tended to be under lower human pressure. However, the differences in the increases of human pressure were small (although size was important). | [26]      |
| 2018 | Central America                      | Normalized Difference Vegetation Index (NDVI)                             | Strict: I-II<br>Non-strict: III-VI         | Strict and non-strict PAs were both effective in avoiding deforestation.                                                                                  | [27]      |
| 2019 | Global (Last wilderness regions)     | Human footprint index                                                     | Strict: I-II<br>Non-strict: III-VI         | There was no statistically significance difference between strict and non-strict PAs.                                                                     | [28]      |
| 2019 | East Africa                          | Habitat conversion (measured using changes in land-cover)                 | Strict: I-IV<br>Non-strict: V-VI           | Land-cover changes were lower within strict PAs.                                                                                                          | [29]      |
| 2019 | Colombia                             | Deforestation                                                             | Strict: I-IV<br>Non-strict: V-VI           | Strict PAs were more effective than non-strict PAs at reducing deforestation rates.                                                                       | [30]      |

| Year | Study region  | Index used                                           | IUCN Categories                                                                                                     | Conclusions                                                                                                                                                                            | Reference |
|------|---------------|------------------------------------------------------|---------------------------------------------------------------------------------------------------------------------|----------------------------------------------------------------------------------------------------------------------------------------------------------------------------------------|-----------|
| 2020 | North America | Mortality rates of mammals                           | Each IUCN category was analyzed separately                                                                          | There was no difference in the mortality rates of mammals between the various categories of PAs.                                                                                       | [31]      |
| 2020 | Global        | Deforestation                                        | Each IUCN category was analyzed separately but were also analyzed as follows:<br>Strict: I-III<br>Non-Strict: IV-VI | The effectiveness of the protected areas in each category varied substantially among regions.                                                                                          | [32]      |
| 2020 | Global        | Alien animal species richness                        | Each IUCN category was analyzed separately                                                                          | There was no obvious relationship between the number of alien animal species established and the IUCN categories. PAs in Category II had the highest number of alien species richness. | [33]      |
| 2020 | Global        | Deforestation                                        | Each IUCN category was analyzed separately                                                                          | Strict PAs (e.g., in Categories Ia and Ib) experienced lower rates of forest loss compared to non-strict PAs (e.g., in Categories IV and VI).                                          | [34]      |
| 2020 | Global        | Mammal population declines driven by illegal hunting | Strict: I-II<br>Non-strict: III-IV<br>Categories V-VI were excluded from the analysis                               | Mammal populations across the globe had lower probabilities of decline in strict PAs compared to non-strict PAs.                                                                       | [35]      |
| 2020 | Global        | Land productivity                                    | Each IUCN category was analyzed separately                                                                          | Land productivity was most stable in PAs in Categories III and VI and most unstable in PAs in Category V.                                                                              | [36]      |

## References:

1. Joppa LN, Loarie SR, Pimm SL. On the protection of “protected areas.” *Proceedings of the National Academy of Sciences of the United States of America*. 2008;105: 6673–6678. doi:10.1073/pnas.0802471105
2. Leroux SJ, Krawchuk MA, Schmiegelow F, Cumming SG, Lisgo K, Anderson LG, et al. Global protected areas and IUCN designations: Do the categories match the conditions? *Biological Conservation*. Elsevier Ltd; 2010;143: 609–616. doi:10.1016/j.biocon.2009.11.018
3. Scharlemann JPW, Kapos V, Campbell A, Lysenko I, Burgess ND, Hansen MC, et al. Securing tropical forest carbon: The contribution of protected areas to REDD. *Oryx*. 2010;44: 352–357. doi:10.1017/S0030605310000542
4. Joppa LN, Pfaff A. Global protected area impacts. *Proceedings of the Royal Society B: Biological Sciences*. 2011;278: 1633–1638. doi:10.1098/rspb.2010.1713
5. Seiferling IS, Proulx R, Peres-Neto PR, Fahrig L, Messier C. Measuring Protected-Area Isolation and Correlations of Isolation with Land-Use Intensity and Protection Status. *Conservation Biology*. 2012;26: 610–618. doi:10.1111/j.1523-1739.2011.01674.x
6. Nelson A, Chomitz KM. Effectiveness of strict vs. multiple use protected areas in reducing tropical forest fires: A global analysis using matching methods. Bruun HH, editor. *PLoS ONE*. Public Library of Science; 2011;6: e22722. doi:10.1371/journal.pone.0022722
7. Porter-Bolland L, Ellis EA, Guariguata MR, Ruiz-Mallén I, Negrete-Yankelevich S, Reyes-García V. Community managed forests and forest protected areas: An assessment of their conservation effectiveness across the tropics. *Forest Ecology and Management*. Elsevier B.V.; 2012;268: 6–17. doi:10.1016/j.foreco.2011.05.034
8. Andam KS, Ferraro PJ, Hanauer MM. The effects of protected area systems on ecosystem restoration: A quasi-experimental design to estimate the impact of Costa Rica’s protected area system on forest regrowth. *Conservation Letters*. 2013;6: 317–323. doi:10.1111/conl.12004
9. Leroux SJ, Kerr JT. Land Development in and around Protected Areas at the Wilderness Frontier. *Conservation Biology*. 2013;27: 166–176. doi:10.1111/j.1523-1739.2012.01953.x
10. Ferraro PJ, Hanauer MM, Miteva DA, Canavire-Bacarreza GJ, Pattanayak SK, Sims KRE. More strictly protected areas are not necessarily more protective: Evidence from Bolivia, Costa Rica, Indonesia, and Thailand. *Environmental Research Letters*. 2013;8: 025011. doi:10.1088/1748-9326/8/2/025011
11. Muñoz L, Hausner VH. What do the IUCN categories really protect? A case study of the alpine regions in Spain. *Sustainability (Switzerland)*. 2013;5: 2367–2388. doi:10.3390/su5062367
12. Leisher C, Touval J, Hess SM, Boucher TM, Raymondin L. Land and forest degradation inside protected areas in Latin America. *Diversity*. 2013;5: 779–795. doi:10.3390/d5040779
13. Carranza T, Balmford A, Kapos V, Manica A. Protected area effectiveness in reducing conversion in a rapidly vanishing ecosystem: The



- Brazilian Cerrado. *Conservation Letters*. 2014;7: 216–223. doi:10.1111/conl.12049
14. Pfaff A, Robalino J, Lima E, Sandoval C, Herrera LD. Governance, Location and Avoided Deforestation from Protected Areas: Greater Restrictions Can Have Lower Impact, Due to Differences in Location. *World Development*. Elsevier Ltd; 2014;55: 7–20. doi:10.1016/j.worlddev.2013.01.011
  15. Coetzee BWT, Gaston KJ, Chown SL. Local scale comparisons of biodiversity as a test for global protected area ecological performance: A meta-analysis. Guralnick R, editor. *PLoS ONE*. 2014;9: e105824. doi:10.1371/journal.pone.0105824
  16. Françoso RD, Brandão R, Nogueira CC, Salmona YB, Machado RB, Colli GR. Habitat loss and the effectiveness of protected areas in the Cerrado Biodiversity Hotspot. *Natureza & Conservação*. 2015;13: 35–40. doi:10.1016/j.ncon.2015.04.001
  17. Blackman A, Pfaff A, Robalino J. Paper park performance: Mexico’s natural protected areas in the 1990s. *Global Environmental Change*. Elsevier Ltd; 2015;31: 50–61. doi:10.1016/j.gloenvcha.2014.12.004
  18. Blackman A. Strict versus mixed-use protected areas: Guatemala’s Maya Biosphere Reserve. *Ecological Economics*. Elsevier B.V.; 2015;112: 14–24. doi:10.1016/j.ecolecon.2015.01.009
  19. Brun C, Cook AR, Lee JSH, Wich SA, Koh LP, Carrasco LR. Analysis of deforestation and protected area effectiveness in Indonesia: A comparison of Bayesian spatial models. *Global Environmental Change*. Elsevier Ltd; 2015;31: 285–295. doi:10.1016/j.gloenvcha.2015.02.004
  20. Wendland KJ, Baumann M, Lewis DJ, Sieber A, Radeloff VC. Protected area effectiveness in European Russia: A postmatching panel data analysis. *Land Economics*. 2015;91: 149–168. doi:10.3368/le.91.1.149
  21. Butsic V, Munteanu C, Griffiths P, Knorn J, Radeloff VC, Lieskovský J, et al. The effect of protected areas on forest disturbance in the Carpathian Mountains 1985–2010. *Conservation Biology*. 2017;31: 570–580. doi:10.1111/cobi.12835
  22. Miranda JJ, Corral L, Blackman A, Asner G, Lima E. Effects of Protected Areas on Forest Cover Change and Local Communities: Evidence from the Peruvian Amazon. *World Development*. 2016;78: 288–307. doi:10.1016/j.worlddev.2015.10.026
  23. Gray CL, Hill SLL, Newbold T, Hudson LN, Boërger L, Contu S, et al. Local biodiversity is higher inside than outside terrestrial protected areas worldwide. *Nature Communications*. 2016;7: 12306. doi:10.1038/ncomms12306
  24. de Marques AAB, Schneider M, Peres CA. Human population and socioeconomic modulators of conservation performance in 788 Amazonian and Atlantic Forest reserves. *PeerJ*. 2016;2016: e2206. doi:10.7717/peerj.2206
  25. Bebber DP, Butt N. Tropical protected areas reduced deforestation carbon emissions by one third from 2000-2012. *Scientific Reports*. 2017;7: 14005. doi:10.1038/s41598-017-14467-w
  26. Jones KR, Venter O, Fuller RA, Allan JR, Maxwell SL, Negret PJ, et al. One-third of global protected land is under intense human pressure. *Science*. 2018;360: 788–791. doi:10.1126/science.aap9565
  27. Muñoz Brenes CL, Jones KW, Schlesinger P, Robalino J, Vierling L. The impact of protected area governance and management capacity

- on ecosystem function in Central America. Mertens F, editor. PLoS ONE. 2018;13: e0205964. doi:10.1371/journal.pone.0205964
28. Anderson E, Mammides C. The role of protected areas in mitigating human impact in the world's last wilderness areas. *Ambio*. Springer Netherlands; 2020;49: 434–441. doi:10.1007/s13280-019-01213-x
  29. Riggio J, Jacobson AP, Hijmans RJ, Caro T. How effective are the protected areas of East Africa? *Global Ecology and Conservation*. Elsevier Ltd; 2019;17: e00573. doi:10.1016/j.gecco.2019.e00573
  30. Bonilla-Mejía L, Higuera-Mendieta I. Protected Areas under Weak Institutions: Evidence from Colombia. *World Development*. 2019;122: 585–596. doi:10.1016/j.worlddev.2019.06.019
  31. Hill JE, DeVault TL, Belant JL. Protected areas reduce poaching but not overall anthropogenic mortality of North American mammals. *Global Ecology and Conservation*. Elsevier Ltd; 2020;21: e00810. doi:10.1016/j.gecco.2019.e00810
  32. Leberger R, Rosa IMD, Guerra CA, Wolf F, Pereira HM. Global patterns of forest loss across IUCN categories of protected areas. *Biological Conservation*. Elsevier; 2020;241: 108299. doi:10.1016/j.biocon.2019.108299
  33. Liu X, Blackburn TM, Song T, Wang X, Huang C, Li Y. Animal invaders threaten protected areas worldwide. *Nature Communications*. Springer US; 2020;11: 2892. doi:10.1038/s41467-020-16719-2
  34. Wade CM, Austin KG, Cajka J, Lapidus D, Everett KH, Galperin D, et al. What Is Threatening Forests in Protected Areas? A Global Assessment of Deforestation in Protected Areas, 2001–2018. *Forests*. 2020;11: 539. doi:10.3390/f11050539
  35. Rija AA, Critchlow R, Thomas CD, Beale CM. Global extent and drivers of mammal population declines in protected areas under illegal hunting pressure. Grignolio S, editor. PLoS ONE. 2020;15: e0227163. doi:10.1371/journal.pone.0227163
  36. de la Fuente B, Weynants M, Bertzky B, Delli G, Mandrici A, Garcia Bendito E, et al. Land productivity dynamics in and around protected areas globally from 1999 to 2013. Martínez-Paz JM, editor. PLoS ONE. 2020;15: e0224958. doi:10.1371/journal.pone.0224958

Table S2. Mean values for each of the confounding variables included in the analysis. NC = protected areas with no IUCN category

| IUCN Category | Area (km <sup>2</sup> ) | Elevation (m) | Slope (degree) | Nearest city (km) | Human footprint in 1993 | Forest cover in 2000 (%) |
|---------------|-------------------------|---------------|----------------|-------------------|-------------------------|--------------------------|
| Afrotropical  |                         |               |                |                   |                         |                          |
| Ia            | 420                     | 826           | 8.39           | 71                | 5.8                     | 76.5                     |
| Ib            | 7454                    | 1168          | 6.07           | 73                | 6.7                     | 76.9                     |
| II            | 3326                    | 898           | 3.61           | 78                | 5.9                     | 51.3                     |
| III           | 697                     | 972           | 2.10           | 52                | 6.5                     | 45.7                     |
| IV            | 2952                    | 700           | 4.45           | 86                | 6.0                     | 67.5                     |
| V             | 791                     | 914           | 3.28           | 66                | 7.6                     | 33.0                     |
| VI            | 3174                    | 822           | 2.18           | 108               | 6.5                     | 45.5                     |
| NC            | 328                     | 768           | 3.02           | 73                | 8.0                     | 55.9                     |
| Australasian  |                         |               |                |                   |                         |                          |
| Ia            | 350                     | 290           | 2.35           | 310               | 4.7                     | 48.1                     |
| Ib            | 333                     | 565           | 8.11           | 162               | 1.7                     | 86.9                     |
| II            | 849                     | 327           | 4.89           | 300               | 4.5                     | 70.7                     |
| III           | 44                      | 351           | 6.90           | 147               | 4.3                     | 71.0                     |
| IV            | 130                     | 457           | 6.93           | 143               | 6.5                     | 59.7                     |
| V             | 224                     | 355           | 7.61           | 100               | 4.6                     | 78.7                     |
| VI            | 1638                    | 240           | 2.49           | 273               | 4.3                     | 56.0                     |
| NC            | 1409                    | 330           | 4.69           | 150               | 5.2                     | 61.4                     |
| Indomalayan   |                         |               |                |                   |                         |                          |
| Ia            | 299                     | 443           | 8.46           | 106               | 7.3                     | 92.1                     |
| Ib            | 77                      | 127           | 3.20           | 57                | 11.1                    | 75.3                     |
| II            | 623                     | 586           | 8.13           | 74                | 8.6                     | 77.5                     |
| III           | 7                       | 104           | 1.32           | 115               | 11.3                    | 96.0                     |
| IV            | 451                     | 543           | 5.67           | 103               | 11.5                    | 52.2                     |
| V             | 154                     | 375           | 6.60           | 140               | 12.5                    | 63.3                     |
| VI            | 1110                    | 655           | 9.12           | 75                | 7.4                     | 86.2                     |
| NC            | 695                     | 432           | 4.79           | 102               | 11.6                    | 57.4                     |
| Nearctic      |                         |               |                |                   |                         |                          |
| Ia            | 67                      | 1100          | 8.90           | 246               | 2.3                     | 70.5                     |
| Ib            | 569                     | 1576          | 9.02           | 204               | 2.3                     | 51.6                     |
| II            | 809                     | 790           | 5.87           | 225               | 4.4                     | 68.0                     |
| III           | 11                      | 417           | 3.95           | 128               | 12.0                    | 69.2                     |
| IV            | 1003                    | 342           | 1.26           | 138               | 10.1                    | 41.4                     |
| V             | 126                     | 563           | 3.63           | 148               | 7.1                     | 57.7                     |
| VI            | 193                     | 505           | 1.45           | 147               | 4.3                     | 43.6                     |

| IUCN Category | Area (km <sup>2</sup> ) | Elevation (m) | Slope (degree) | Nearest city (km) | Human footprint in 1993 | Forest cover in 2000 (%) |
|---------------|-------------------------|---------------|----------------|-------------------|-------------------------|--------------------------|
| NC            | 2363                    | 574           | 3.62           | 157               | 7.9                     | 50.0                     |
| Neotropical   |                         |               |                |                   |                         |                          |
| Ia            | 1177                    | 464           | 4.07           | 150               | 6.1                     | 74.8                     |
| Ib            | 15                      | 967           | 6.87           | 62                | 10.7                    | 59.0                     |
| II            | 1694                    | 984           | 9.07           | 80                | 7.0                     | 73.8                     |
| III           | 1574                    | 1347          | 7.52           | 61                | 8.6                     | 60.0                     |
| IV            | 410                     | 616           | 7.14           | 64                | 7.4                     | 70.0                     |
| V             | 1659                    | 611           | 6.34           | 64                | 13.5                    | 56.1                     |
| VI            | 1658                    | 1037          | 7.44           | 83                | 7.3                     | 77.7                     |
| NC            | 1621                    | 863           | 5.97           | 106               | 7.8                     | 68.8                     |
| Palearctic    |                         |               |                |                   |                         |                          |
| Ia            | 1000                    | 716           | 6.88           | 92                | 5.9                     | 58.6                     |
| Ib            | 235                     | 420           | 3.03           | 119               | 3.2                     | 56.3                     |
| II            | 897                     | 705           | 7.57           | 75                | 8.9                     | 53.7                     |
| III           | 39                      | 271           | 2.63           | 94                | 8.5                     | 52.3                     |
| IV            | 168                     | 380           | 5.14           | 91                | 13.3                    | 56.9                     |
| V             | 129                     | 368           | 4.86           | 52                | 18.6                    | 54.0                     |
| VI            | 782                     | 521           | 5.41           | 95                | 12.6                    | 51.4                     |
| NC            | 307                     | 297           | 3.25           | 59                | 14.7                    | 35.6                     |

Table S3. Results of the generalized boosted models, comparing strictly protected areas (Categories I-VI) to: (a) areas in which multiple human uses are allowed (Categories V-VI) and, (b) areas with no IUCN category (NC). HFI = Human footprint index; LFC = Loss in forest cover (%).

| Realm        | Index | Category      | Estimate | Std. Error | t-value | p-value   |
|--------------|-------|---------------|----------|------------|---------|-----------|
| Afrotropical | HFI   | I-VI vs. V-VI | -0.234   | 0.163      | -1.429  | 0.153     |
|              | HFI   | I-VI vs. NC   | 0.147    | 0.104      | 1.418   | 0.156     |
|              | LFC   | I-VI vs. V-VI | 0.214    | 0.682      | 0.313   | 0.754     |
|              | LFC   | I-VI vs. NC   | 3.354    | 0.571      | 5.878   | <0.001*** |
| Australasian | HFI   | I-VI vs. V-VI | 0.202    | 0.291      | 0.693   | 0.488     |
|              | HFI   | I-VI vs. NC   | 1.814    | 0.467      | 3.887   | <0.001*** |
|              | LFC   | I-VI vs. V-VI | -3.872   | 0.866      | -4.471  | <0.001*** |
|              | LFC   | I-VI vs. NC   | -3.888   | 1.375      | -2.828  | 0.005**   |
| Indomalayan  | HFI   | I-VI vs. V-VI | 0.275    | 0.367      | 0.749   | 0.454     |
|              | HFI   | I-VI vs. NC   | 0.411    | 0.497      | 0.826   | 0.409     |
|              | LFC   | I-VI vs. V-VI | 2.090    | 0.799      | 2.615   | 0.009**   |
|              | LFC   | I-VI vs. NC   | 6.244    | 3.357      | 1.860   | 0.063     |
| Nearctic     | HFI   | I-VI vs. V-VI | -0.104   | 0.054      | -1.925  | 0.054     |
|              | HFI   | I-VI vs. NC   | 0.325    | 0.237      | 1.372   | 0.170     |
|              | LFC   | I-VI vs. V-VI | 0.797    | 0.453      | 1.759   | 0.079     |
|              | LFC   | I-VI vs. NC   | -0.542   | 1.264      | -0.428  | 0.668     |
| Neotropical  | HFI   | I-VI vs. V-VI | 0.064    | 0.127      | 0.509   | 0.611     |
|              | HFI   | I-VI vs. NC   | 0.224    | 0.153      | 1.461   | 0.144     |
|              | LFC   | I-VI vs. V-VI | 0.814    | 0.344      | 2.368   | 0.018*    |
|              | LFC   | I-VI vs. NC   | 1.243    | 0.372      | 3.340   | 0.001**   |
| Palearctic   | HFI   | I-VI vs. V-VI | -0.074   | 0.096      | -0.769  | 0.442     |
|              | HFI   | I-VI vs. NC   | 0.194    | 0.164      | 1.182   | 0.237     |
|              | LFC   | I-VI vs. V-VI | 0.267    | 0.231      | 1.157   | 0.247     |
|              | DR    | I-VI vs. NC   | 0.384    | 0.451      | 0.850   | 0.395     |

Table S4. Results of the generalized boosted models when the alternative method was used to classify strictly protected areas (Categories I-II) and multiple-use areas (Categories III-VI). NC = areas with no IUCN Category; HFI = Human footprint index; LFC = Loss in forest cover (%).

| Realm        | Index | Category        | Estimate | Std. Error | t-value | p-value   |
|--------------|-------|-----------------|----------|------------|---------|-----------|
| Afrotropical | HFI   | I-II vs. III-VI | -0.049   | 0.162      | -0.305  | 0.760     |
|              | HFI   | I-II vs. NC     | 0.179    | 0.119      | 1.506   | 0.132     |
|              | LFC   | I-II vs. III-VI | -0.140   | 0.675      | -0.208  | 0.835     |
|              | LFC   | I-II vs. NC     | 3.308    | 0.704      | 4.700   | <0.001*** |
| Australasian | HFI   | I-II vs. III-VI | 0.402    | 0.119      | 3.381   | 0.001**   |
|              | HFI   | I-II vs. NC     | 1.778    | 0.443      | 4.016   | <0.001*** |
|              | LFC   | I-II vs. III-VI | -4.289   | 1.256      | -3.414  | 0.001**   |
|              | LFC   | I-II vs. NC     | -5.374   | 2.271      | -2.366  | 0.018*    |
| Indomalayan  | HFI   | I-II vs. III-VI | 0.828    | 0.235      | 3.516   | <0.001*** |
|              | HFI   | I-II vs. NC     | 1.355    | 0.434      | 3.123   | 0.002*    |
|              | LFC   | I-II vs. III-VI | 1.819    | 0.816      | 2.230   | 0.026*    |
|              | LFC   | I-II vs. NC     | 5.416    | 2.510      | 2.158   | 0.031*    |
| Nearctic     | HFI   | I-II vs. III-VI | 0.009    | 0.040      | 0.225   | 0.822     |
|              | HFI   | I-II vs. NC     | 0.060    | 0.123      | 0.489   | 0.625     |
|              | LFC   | I-II vs. III-VI | 1.153    | 0.661      | 1.744   | 0.081     |
|              | LFC   | I-II vs. NC     | -1.507   | 1.051      | -1.434  | 0.152     |
| Neotropical  | HFI   | I-II vs. III-VI | 0.268    | 0.108      | 2.478   | 0.013*    |
|              | HFI   | I-II vs. NC     | 0.272    | 0.157      | 1.732   | 0.084     |
|              | LFC   | I-II vs. III-VI | 0.835    | 0.350      | 2.386   | 0.017*    |
|              | LFC   | I-II vs. NC     | 1.284    | 0.391      | 3.284   | 0.001**   |
| Palearctic   | HFI   | I-II vs. III-VI | 0.137    | 0.074      | 1.842   | 0.066     |
|              | HFI   | I-II vs. NC     | 0.392    | 0.177      | 2.217   | 0.027*    |
|              | LFC   | I-II vs. III-VI | 0.879    | 0.259      | 3.395   | 0.001*    |
|              | LFC   | I-II vs. NC     | 1.099    | 0.860      | 1.278   | 0.201     |

Table S5. Results of the matching analysis comparing strictly protected areas to areas in which multiple human uses are allowed. Comparisons were made using the Wilcoxon rank test. The total number of protected areas (PAs) and the number of matched areas are also shown.

| Realm                           | Method          | Statistic | p-value   | PAs total | PAs matched |
|---------------------------------|-----------------|-----------|-----------|-----------|-------------|
| <b>Human footprint index</b>    |                 |           |           |           |             |
| Afrotropical                    | I-VI vs. V-VI   | -0.771    | 0.441     | 553       | 288         |
| Australasian                    | I-VI vs. V-VI   | 0.807     | 0.420     | 1403      | 266         |
| Indomalayan                     | I-VI vs. V-VI   | 0.862     | 0.389     | 861       | 226         |
| Nearctic                        | I-VI vs. V-VI   | -4.165    | <0.001*** | 3617      | 3456        |
| Neotropical                     | I-VI vs. V-VI   | 3.065     | 0.002**   | 944       | 688         |
| Palaearctic                     | I-VI vs. V-VI   | -12.148   | <0.001*** | 7697      | 5226        |
| Afrotropical                    | I-II vs. III-VI | 0.826     | 0.409     | 553       | 472         |
| Australasian                    | I-II vs. III-VI | 3.859     | <0.001*** | 1403      | 1100        |
| Indomalayan                     | I-II vs. III-VI | 4.989     | <0.001*** | 861       | 788         |
| Nearctic                        | I-II vs. III-VI | -1.406    | 0.160     | 3617      | 2576        |
| Neotropical                     | I-II vs. III-VI | 3.511     | <0.001*** | 944       | 792         |
| Palaearctic                     | I-II vs. III-VI | 1.062     | 0.288     | 7697      | 1828        |
| <b>Loss in forest cover (%)</b> |                 |           |           |           |             |
| Afrotropical                    | I-VI vs. V-VI   | -0.072    | 0.942     | 423       | 230         |
| Australasian                    | I-VI vs. V-VI   | 1.608     | 0.108     | 1149      | 218         |
| Indomalayan                     | I-VI vs. V-VI   | -3.617    | <0.001*** | 775       | 224         |
| Nearctic                        | I-VI vs. V-VI   | -2.409    | 0.016*    | 3178      | 3086        |
| Neotropical                     | I-VI vs. V-VI   | -4.714    | <0.001*** | 873       | 628         |
| Palaearctic                     | I-VI vs. V-VI   | -7.371    | <0.001*** | 7413      | 5092        |
| Afrotropical                    | I-II vs. III-VI | -0.219    | 0.827     | 423       | 372         |
| Australasian                    | I-II vs. III-VI | 5.486     | <0.001*** | 1149      | 886         |
| Indomalayan                     | I-II vs. III-VI | -0.121    | 0.904     | 775       | 770         |
| Nearctic                        | I-II vs. III-VI | -4.465    | <0.001*** | 3178      | 2158        |
| Neotropical                     | I-II vs. III-VI | -6.053    | <0.001*** | 873       | 762         |
| Palaearctic                     | I-II vs. III-VI | -7.292    | <0.001*** | 7413      | 1694        |

Figure S1. Differences in the change in human footprint between strictly protected areas (1) and matched areas in which multiple human uses are permitted (0). Strictly protected areas represent Categories I-VI and multiple-use areas represent Categories V-VI. Negative numbers indicate a decrease in human footprint.

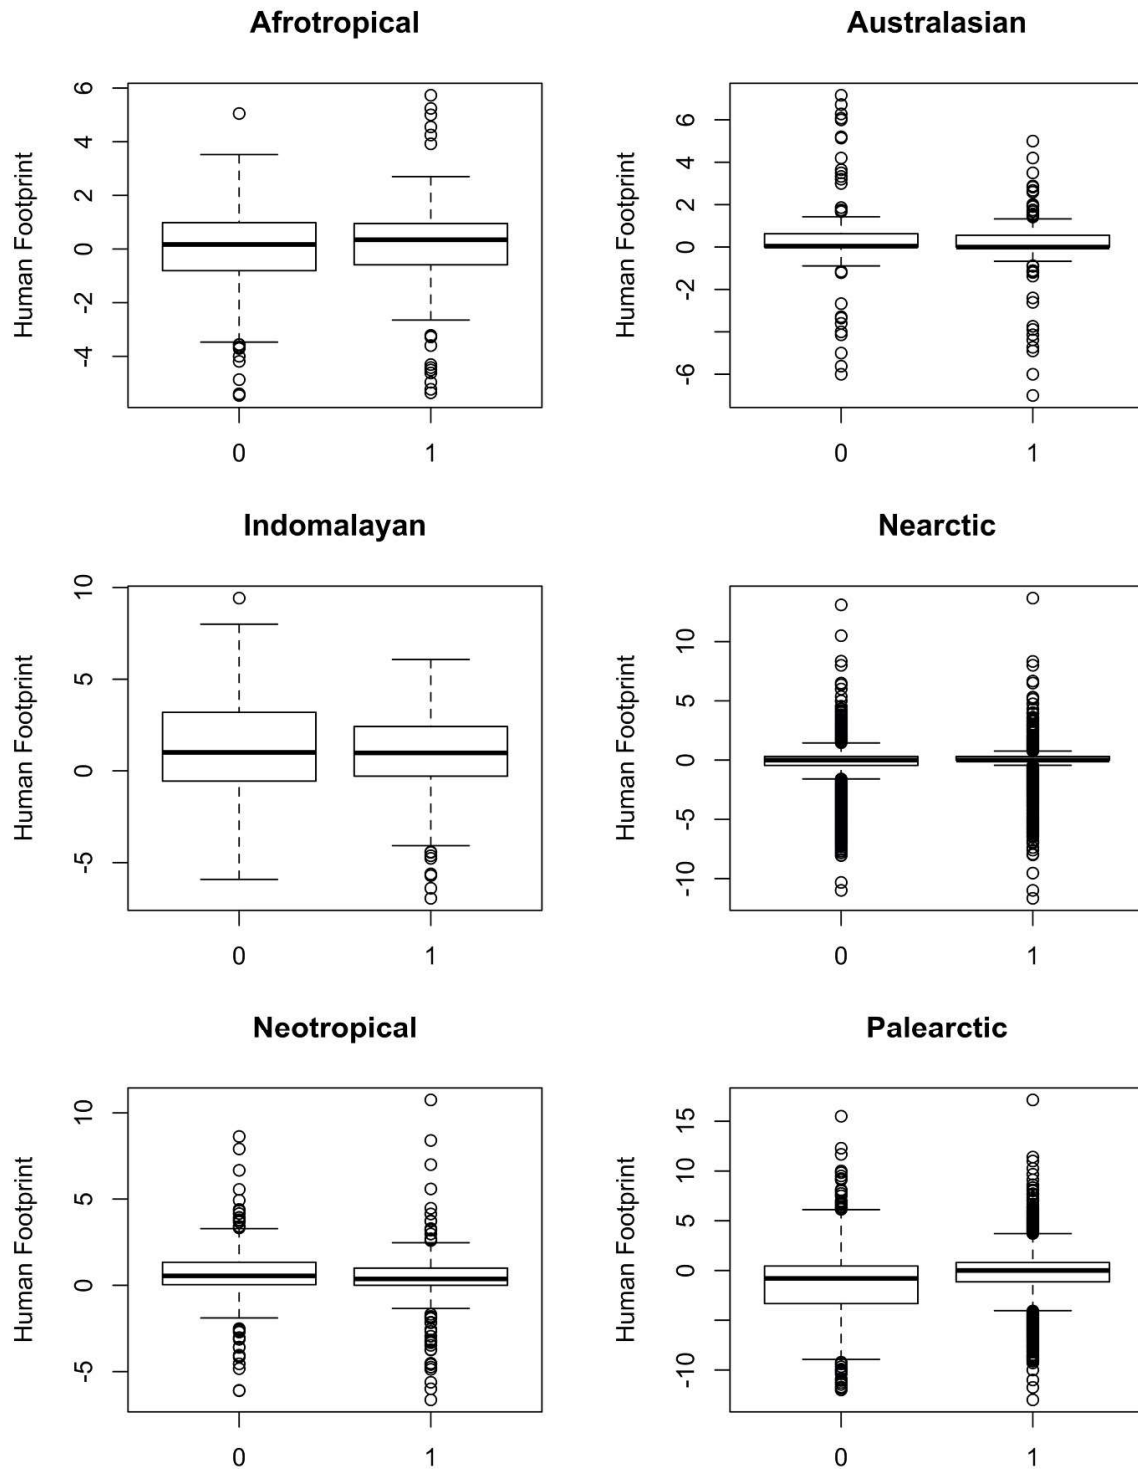



Figure S2. Differences in the change in human footprint between strictly protected areas (1) and matched areas in which multiple human uses are permitted (0). Strictly protected areas represent Categories I-II and multiple-use areas represent Categories III-VI. Negative numbers indicate a decrease in human footprint.

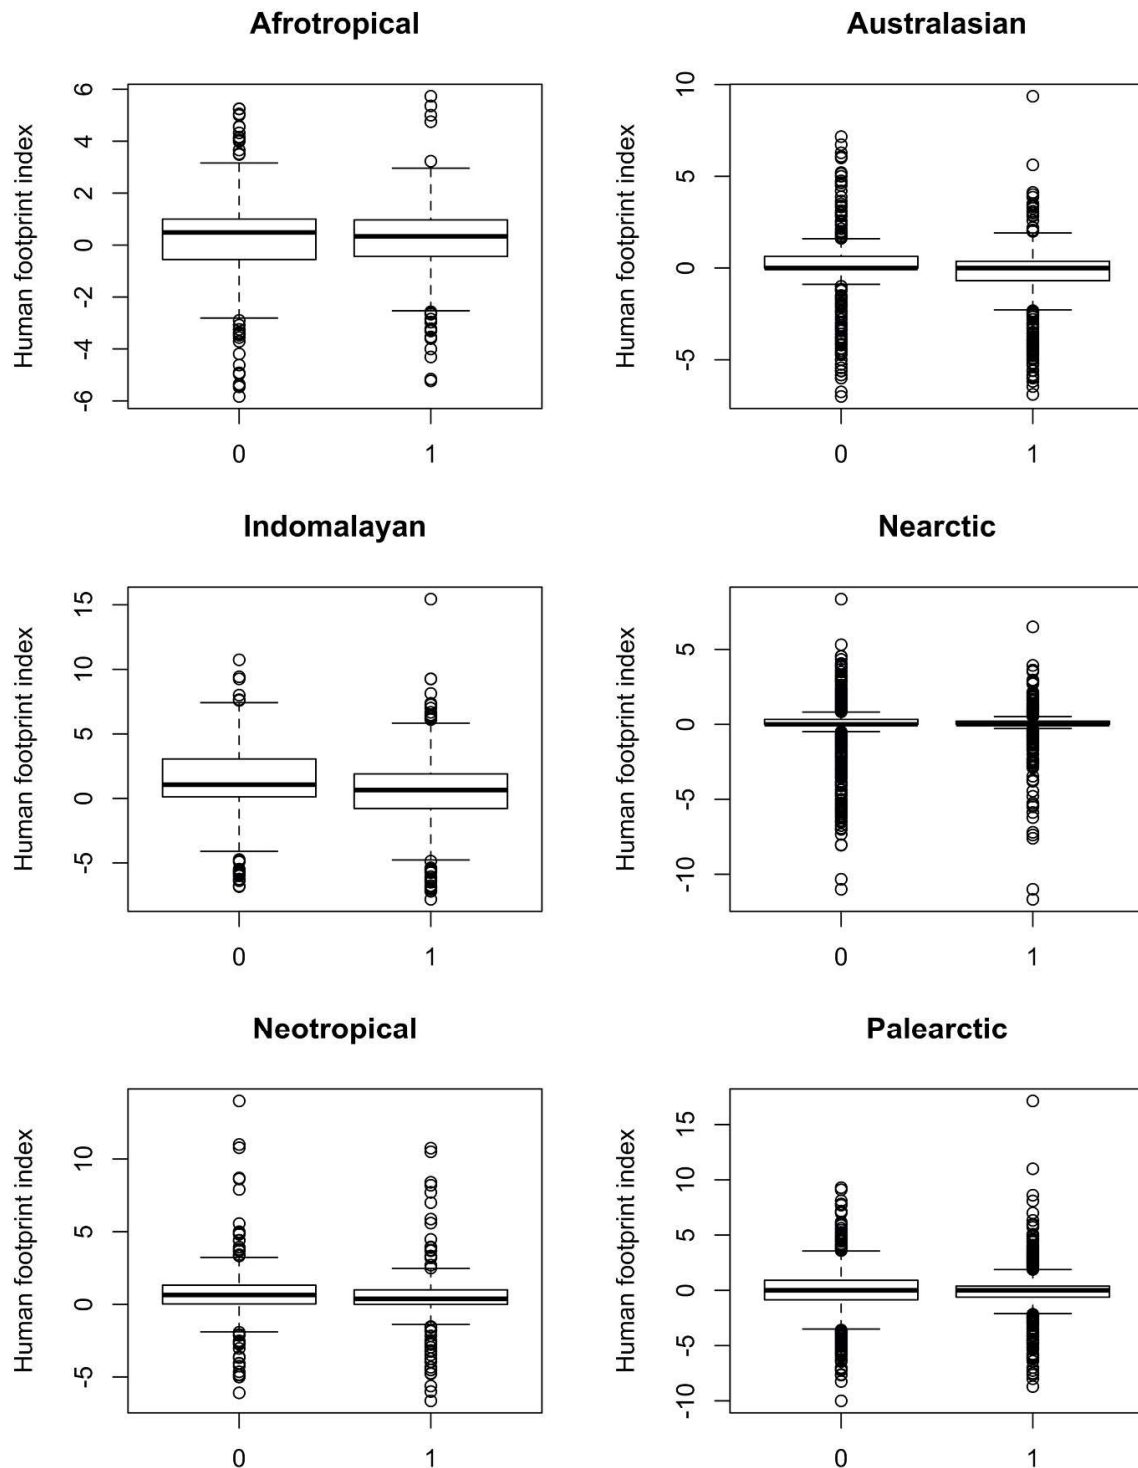

Figure S3. Differences in forest cover loss (%) between strictly protected areas (1) and matched areas in which multiple human uses are permitted (0). Strictly protected areas represent Categories I-IV and multiple-use areas represent Categories V-VI.

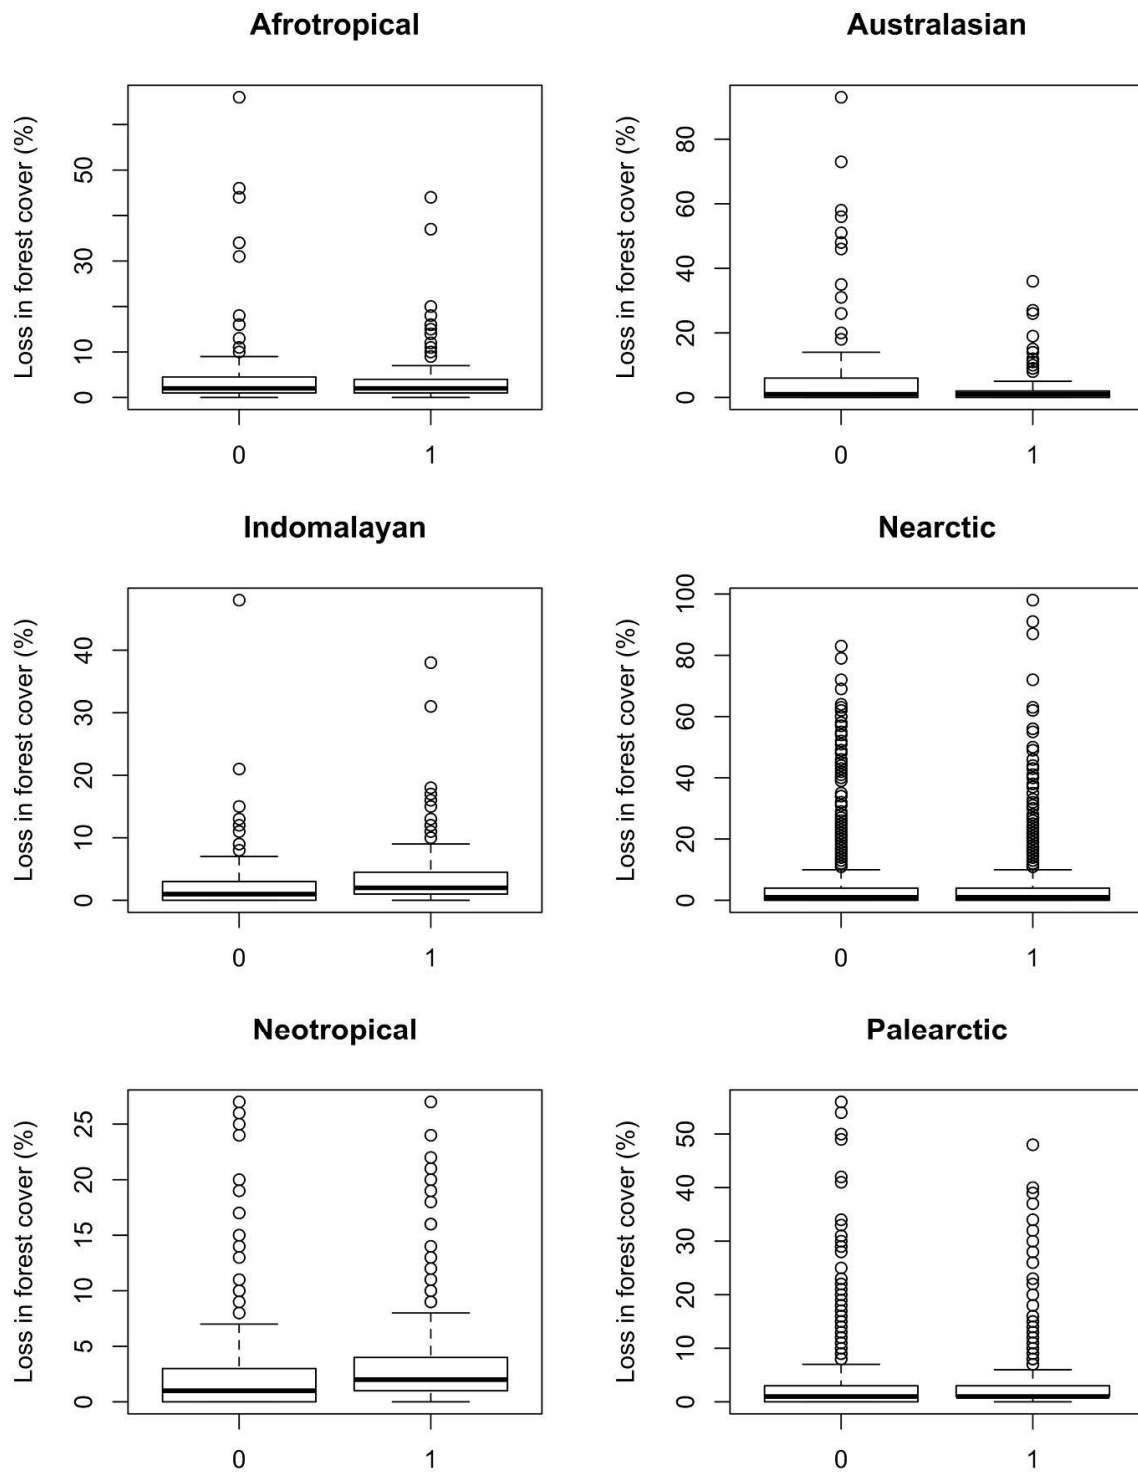

Figure S4. Differences in forest cover loss (%) between strictly protected areas (1) and matched areas in which multiple human uses are permitted (0). Strictly protected areas represent Categories I-II and multiple-use areas represent Categories III-VI.

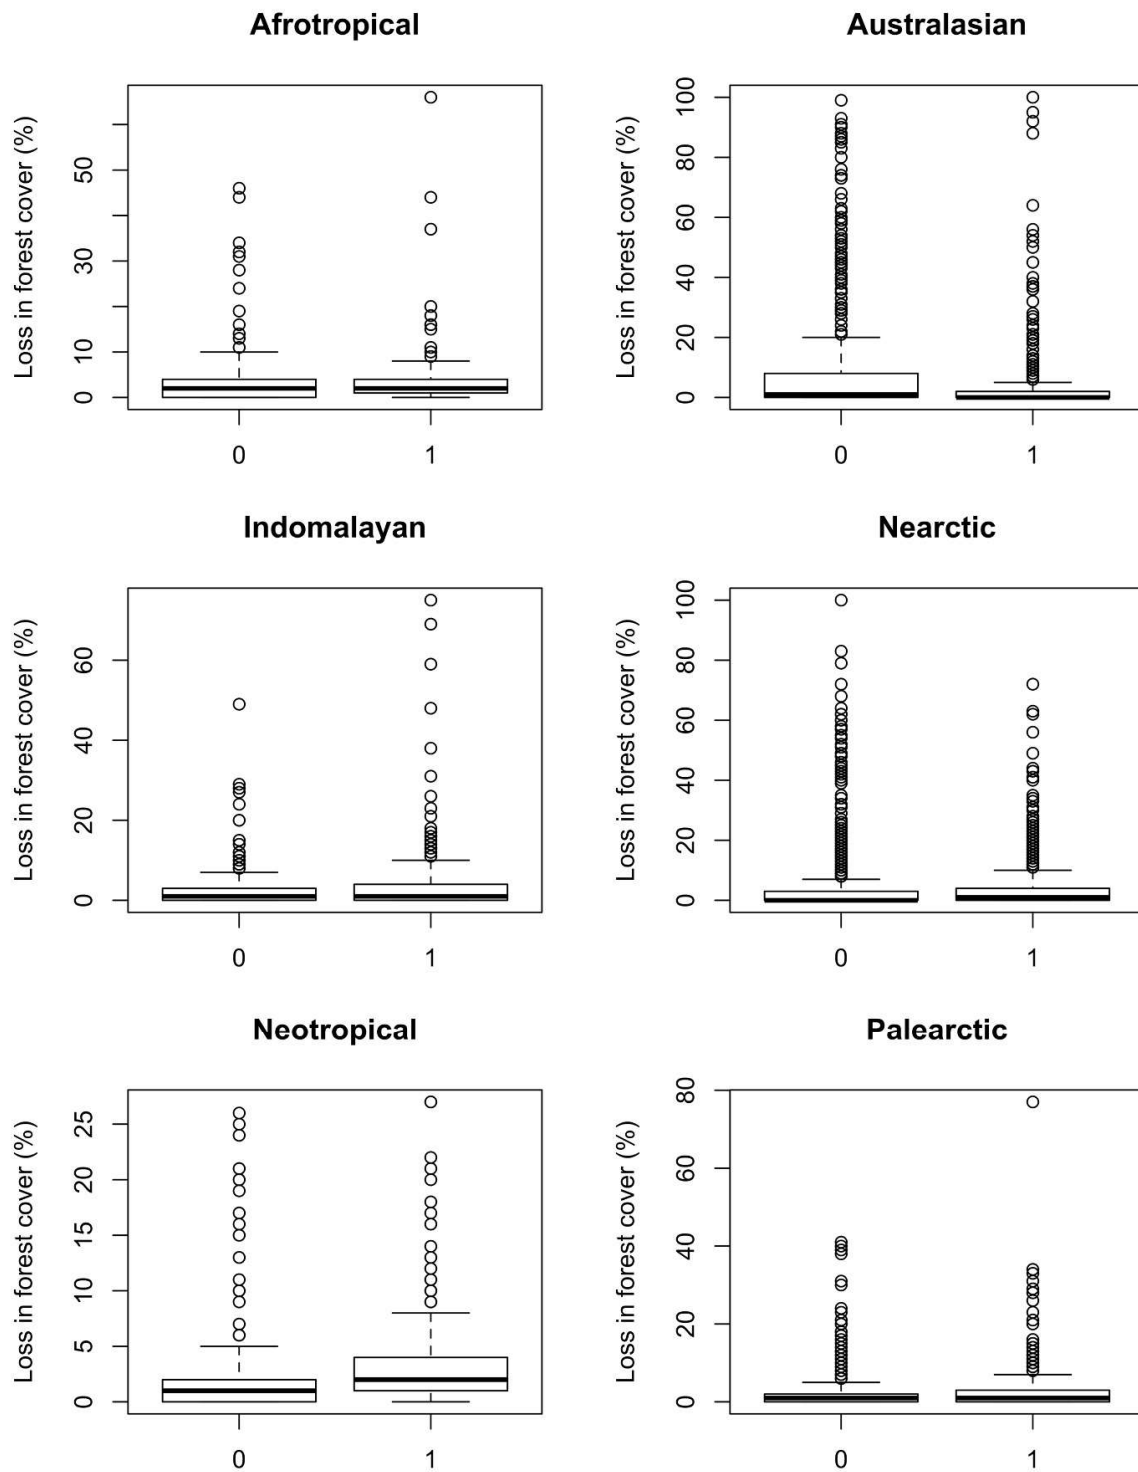

Figure S5. The resulting balance when generalized boosted models were used to compare the three types of protected areas, using the human footprint index and by grouping protected areas as follows: strictly protected = Categories I-IV, multiple-use = Categories V-VI. Unweighted values represent the differences between the treatment groups, for each of the confounding variables, based on the raw data. Solid circles indicate that differences were statistically significant at the 0.05 level.

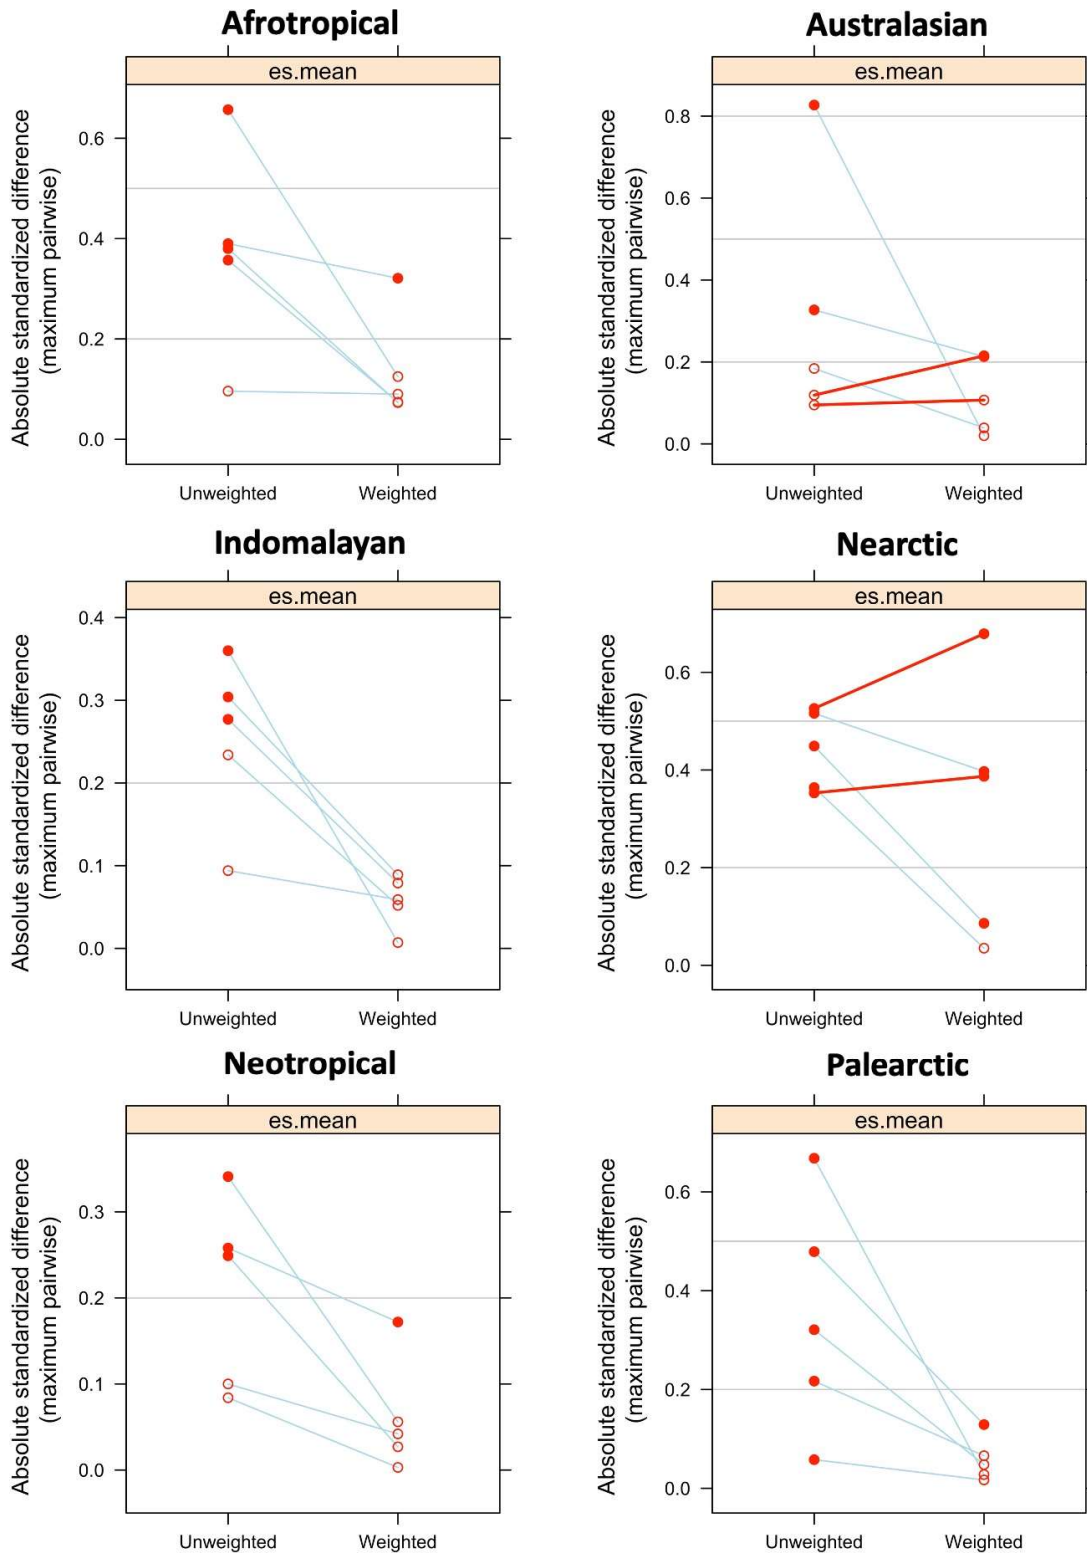

Figure S6. The resulting balance when generalized boosted models were used to compare the three types of protected areas, using the human footprint index and by grouping protected areas as follows: strictly protected = Categories I-II, multiple-use = Categories III-VI.

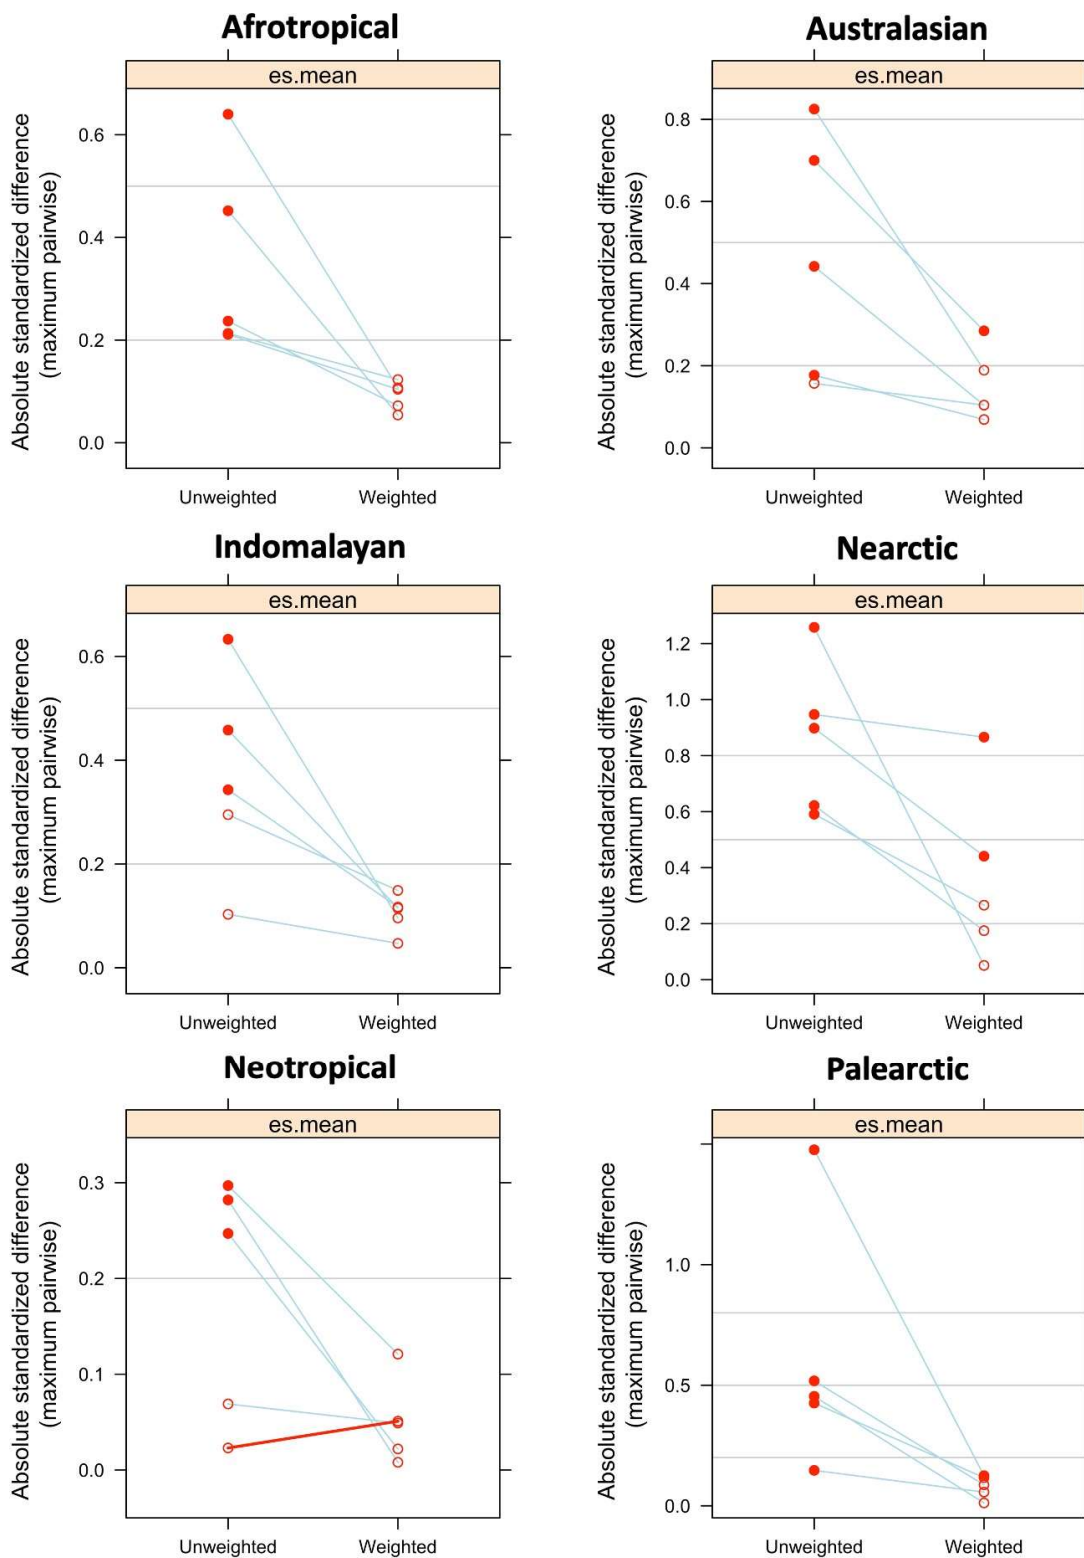

Figure S7. The resulting balance when generalized boosted models were used to compare the three types of protected areas, using the loss in forest cover (%) and by grouping protected areas as follows: strictly protected = Categories I-IV, multiple-use = Categories V-VI.

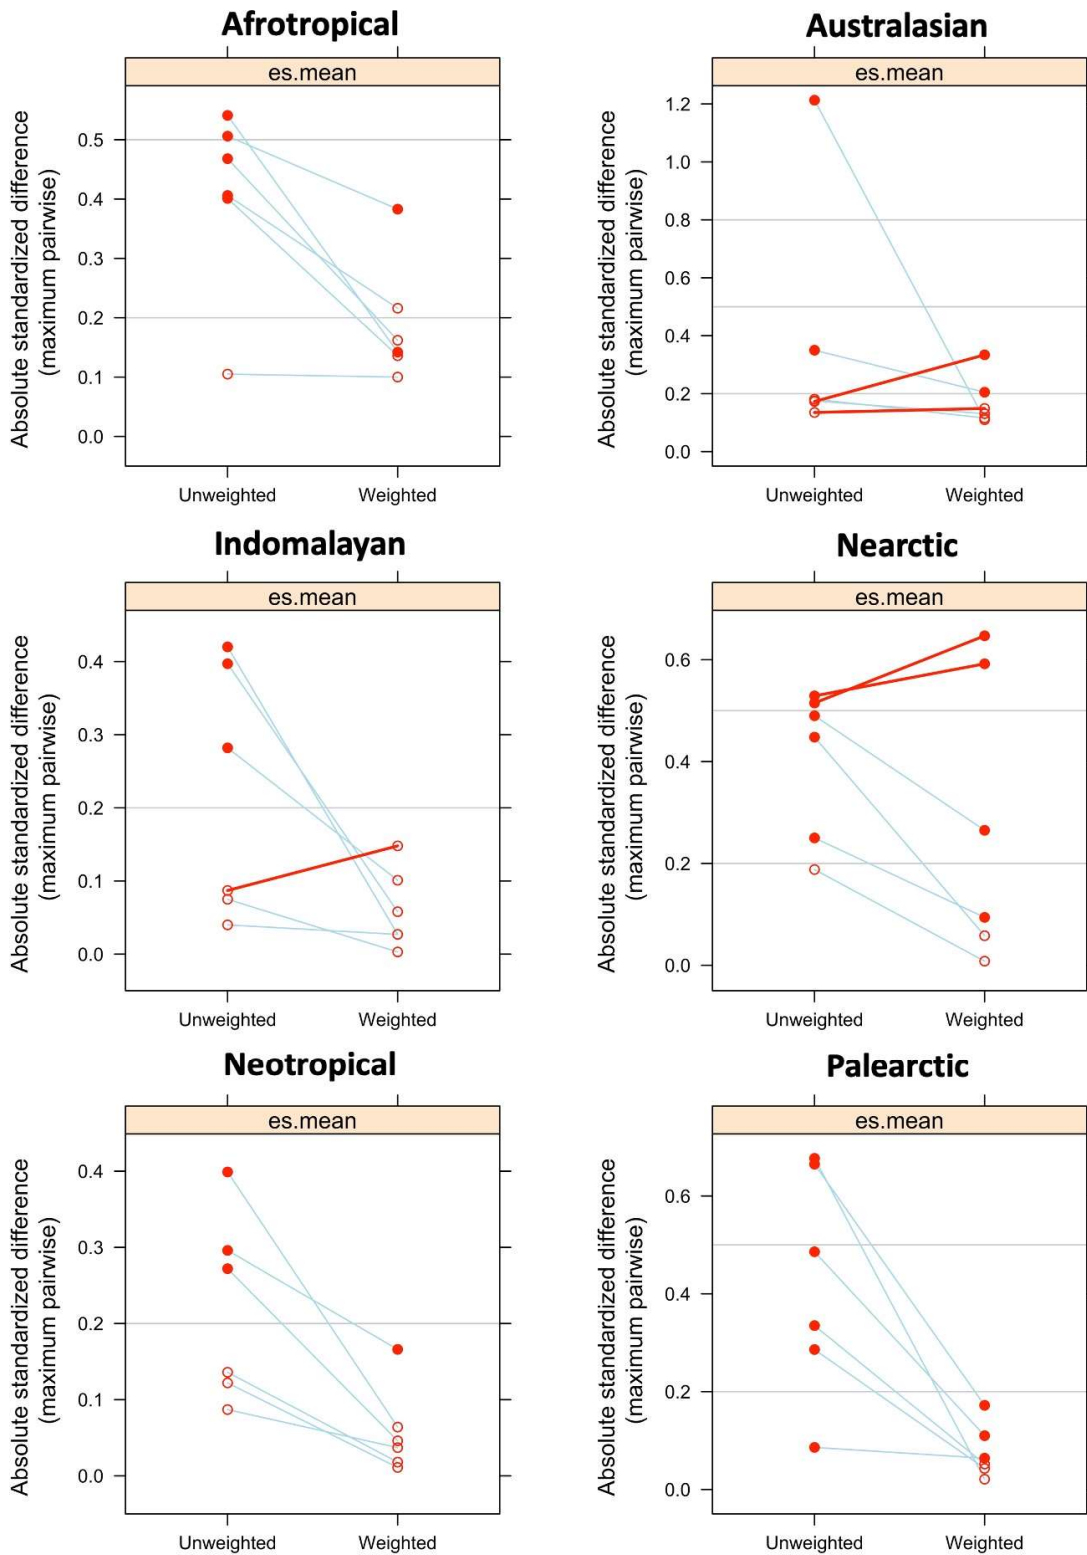

Figure S8. The resulting balance when generalized boosted models were used to compare the three types of protected areas, using the loss in forest cover (%) and by grouping protected areas as follows: strictly protected = Categories I-II, multiple-use = Categories III-VI.

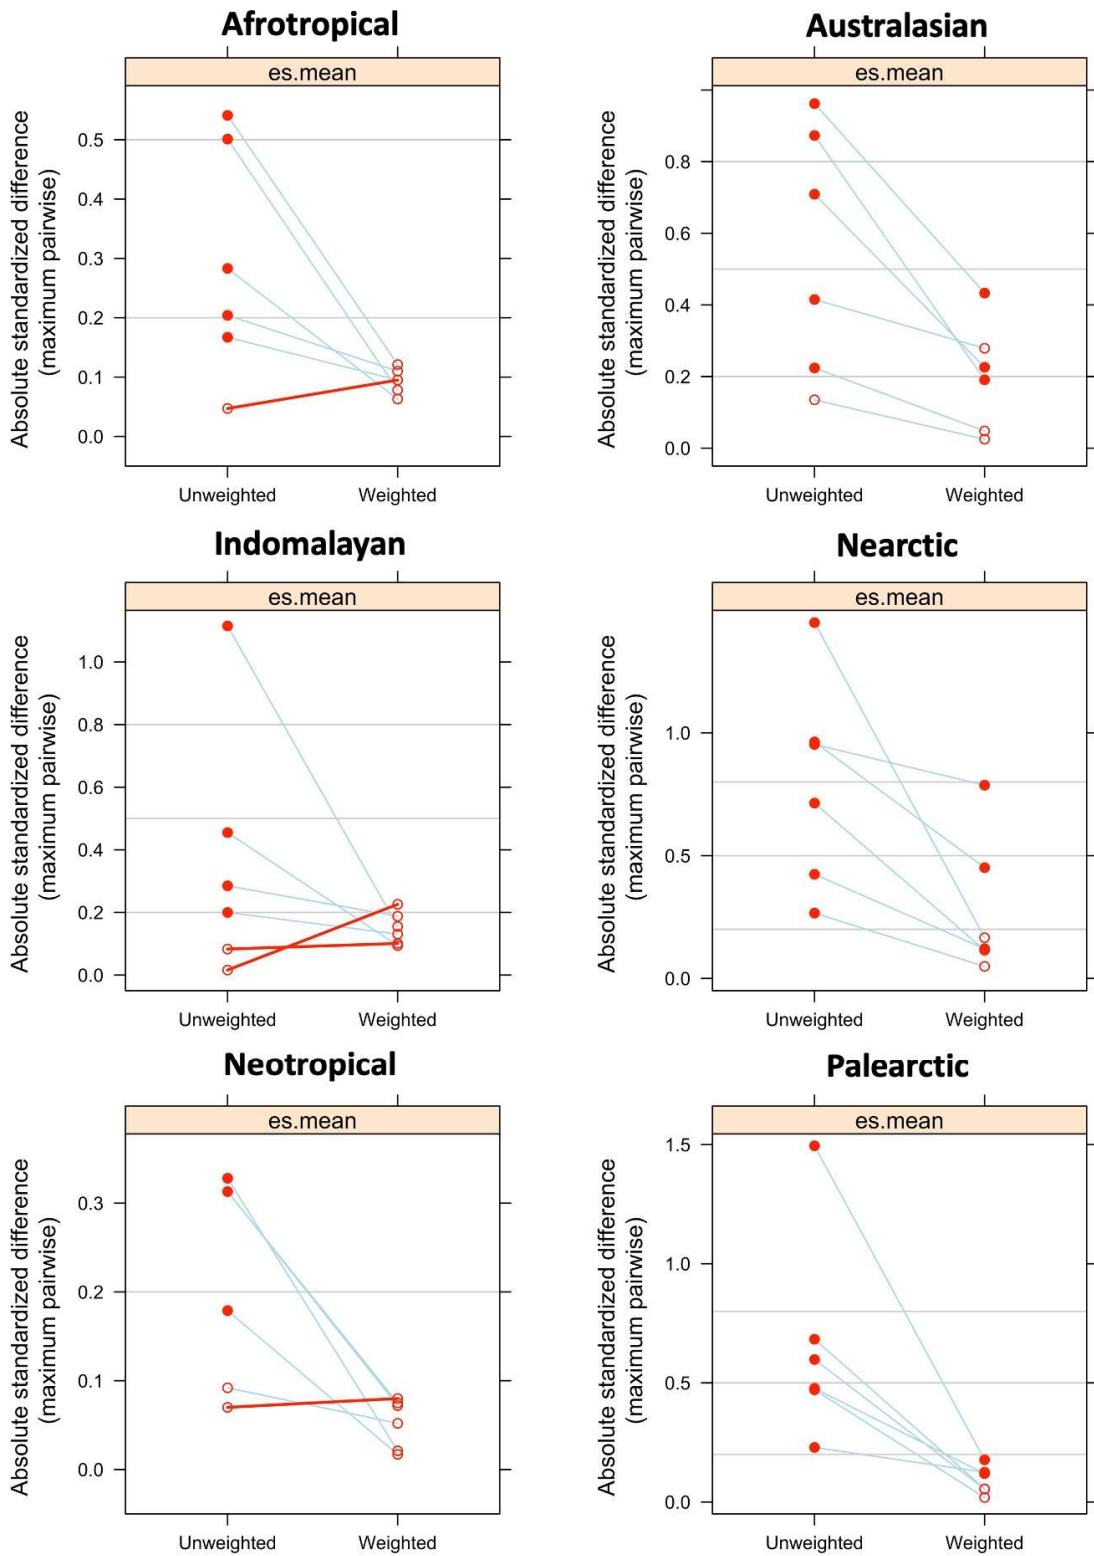

Figure S9. The resulting balance when matching was used to compare the protected areas, using the human footprint index and by grouping protected areas as follows: strictly protected = Categories I-IV, multiple-use = Categories V-VI.

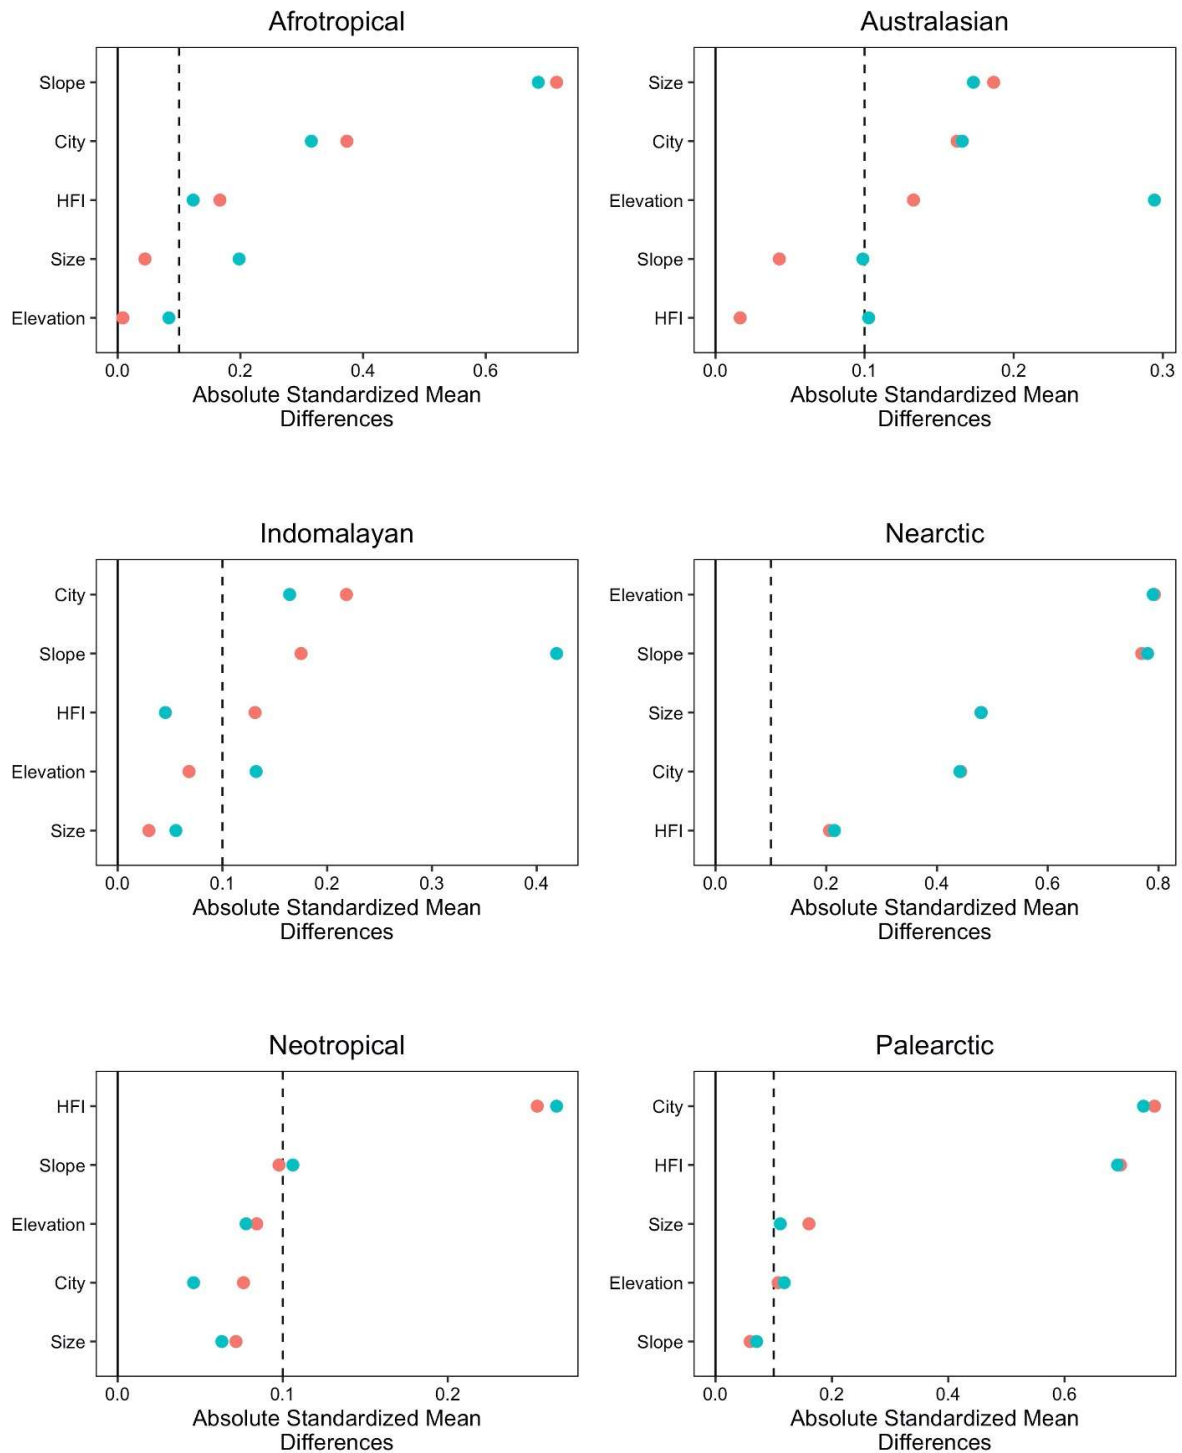



Figure S10. The resulting balance when matching was used to compare the protected areas, using the human footprint index and by grouping protected areas as follows: strictly protected = Categories I-II, multiple-use = Categories III-VI.

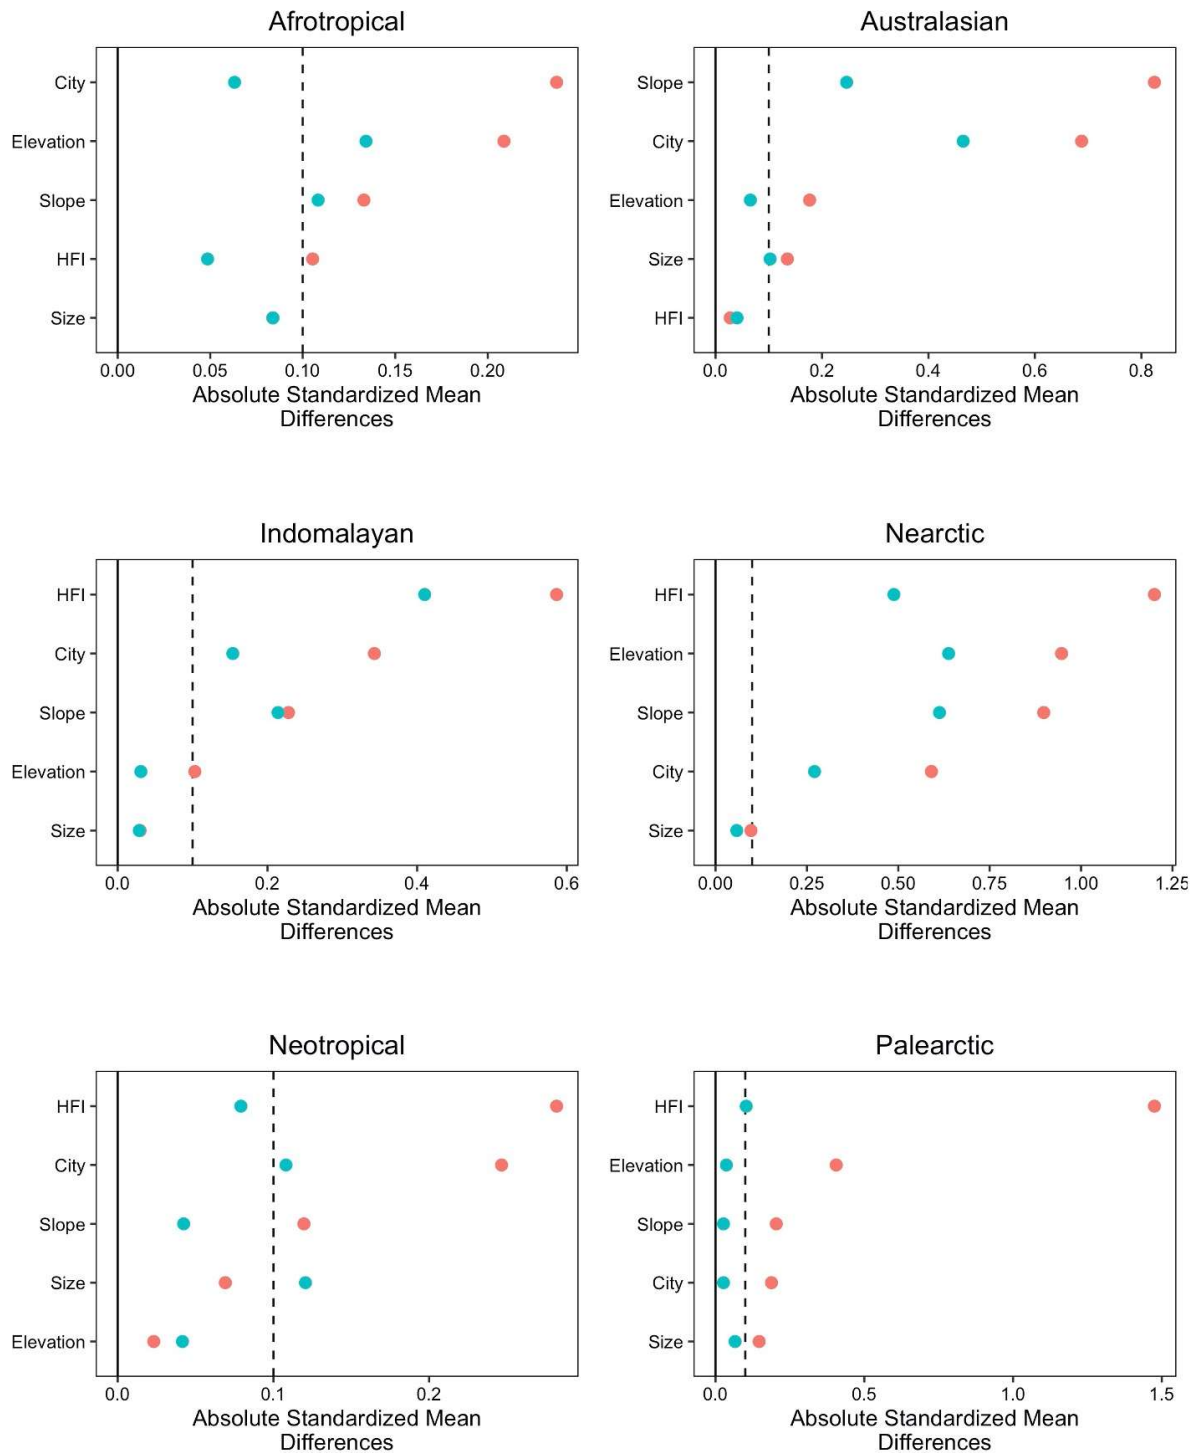

Figure S11. The resulting balance when matching was used to compare the protected areas, using the loss in forest cover (%) and by grouping protected areas as follows: strictly protected = Categories I-IV, multiple-use = Categories V-VI.

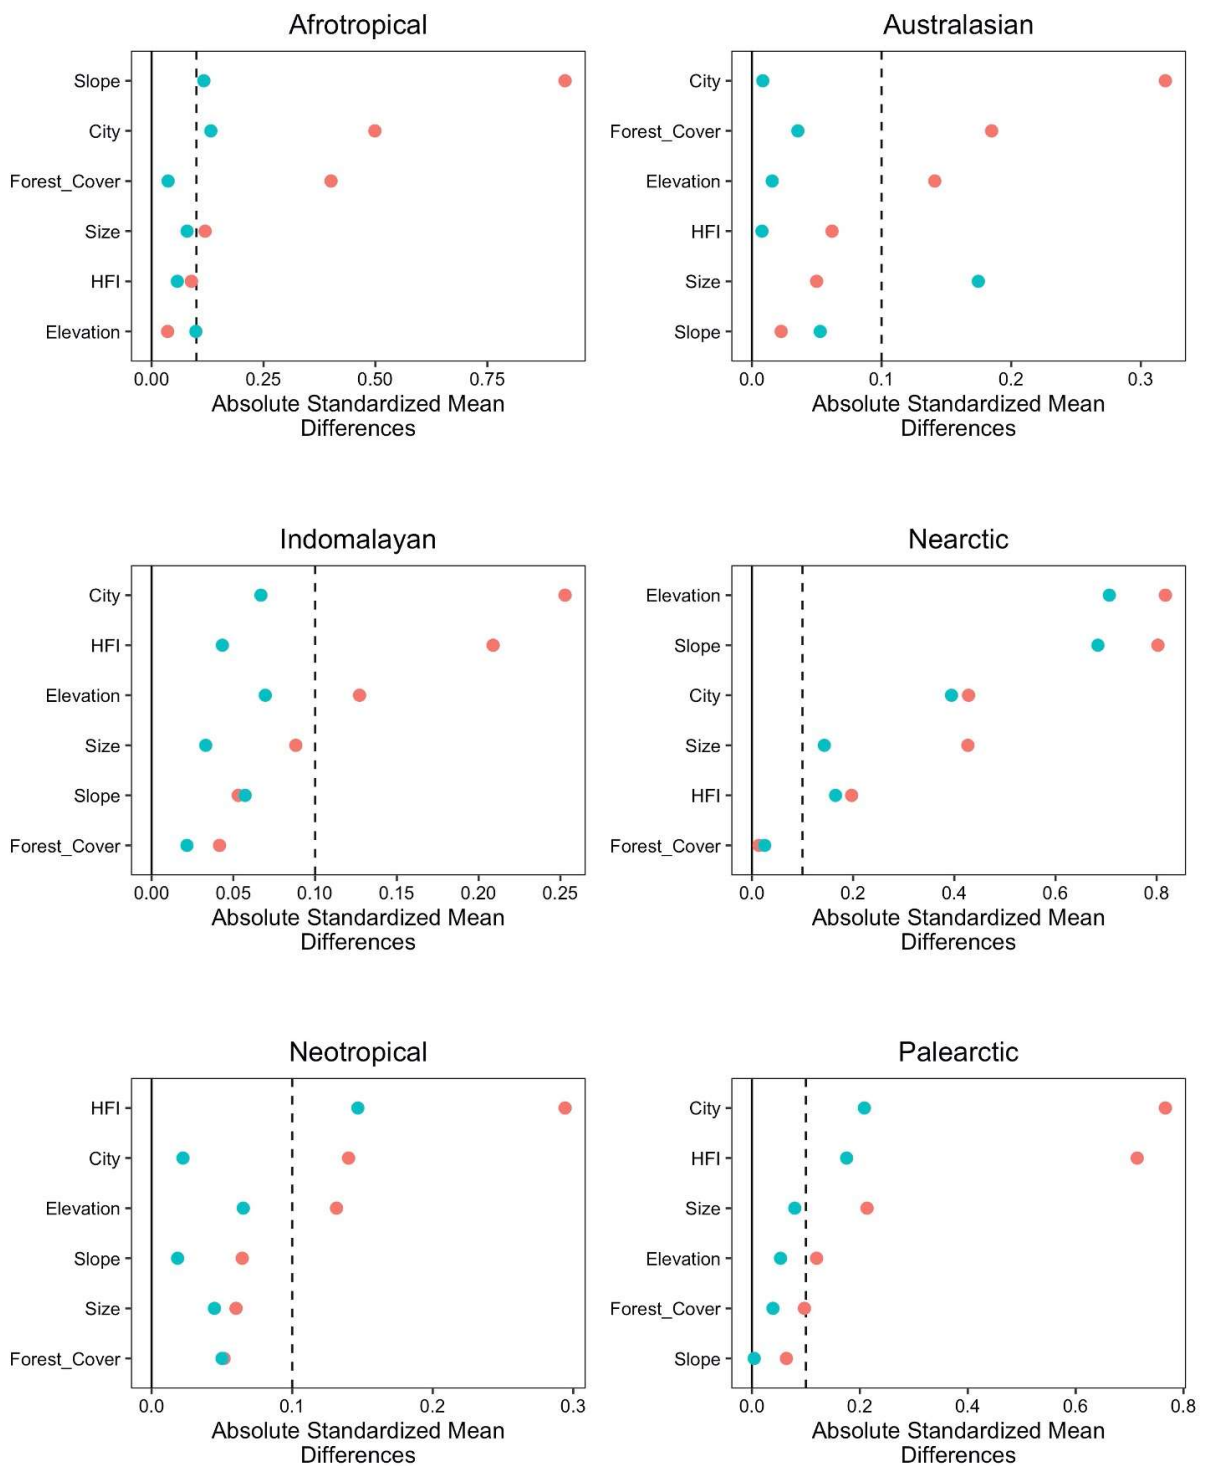

Figure S12. The resulting balance when matching was used to compare the protected areas, using the loss in forest cover (%) and by grouping protected areas as follows: strictly protected = Categories I-II, multiple-use = Categories III-VI.

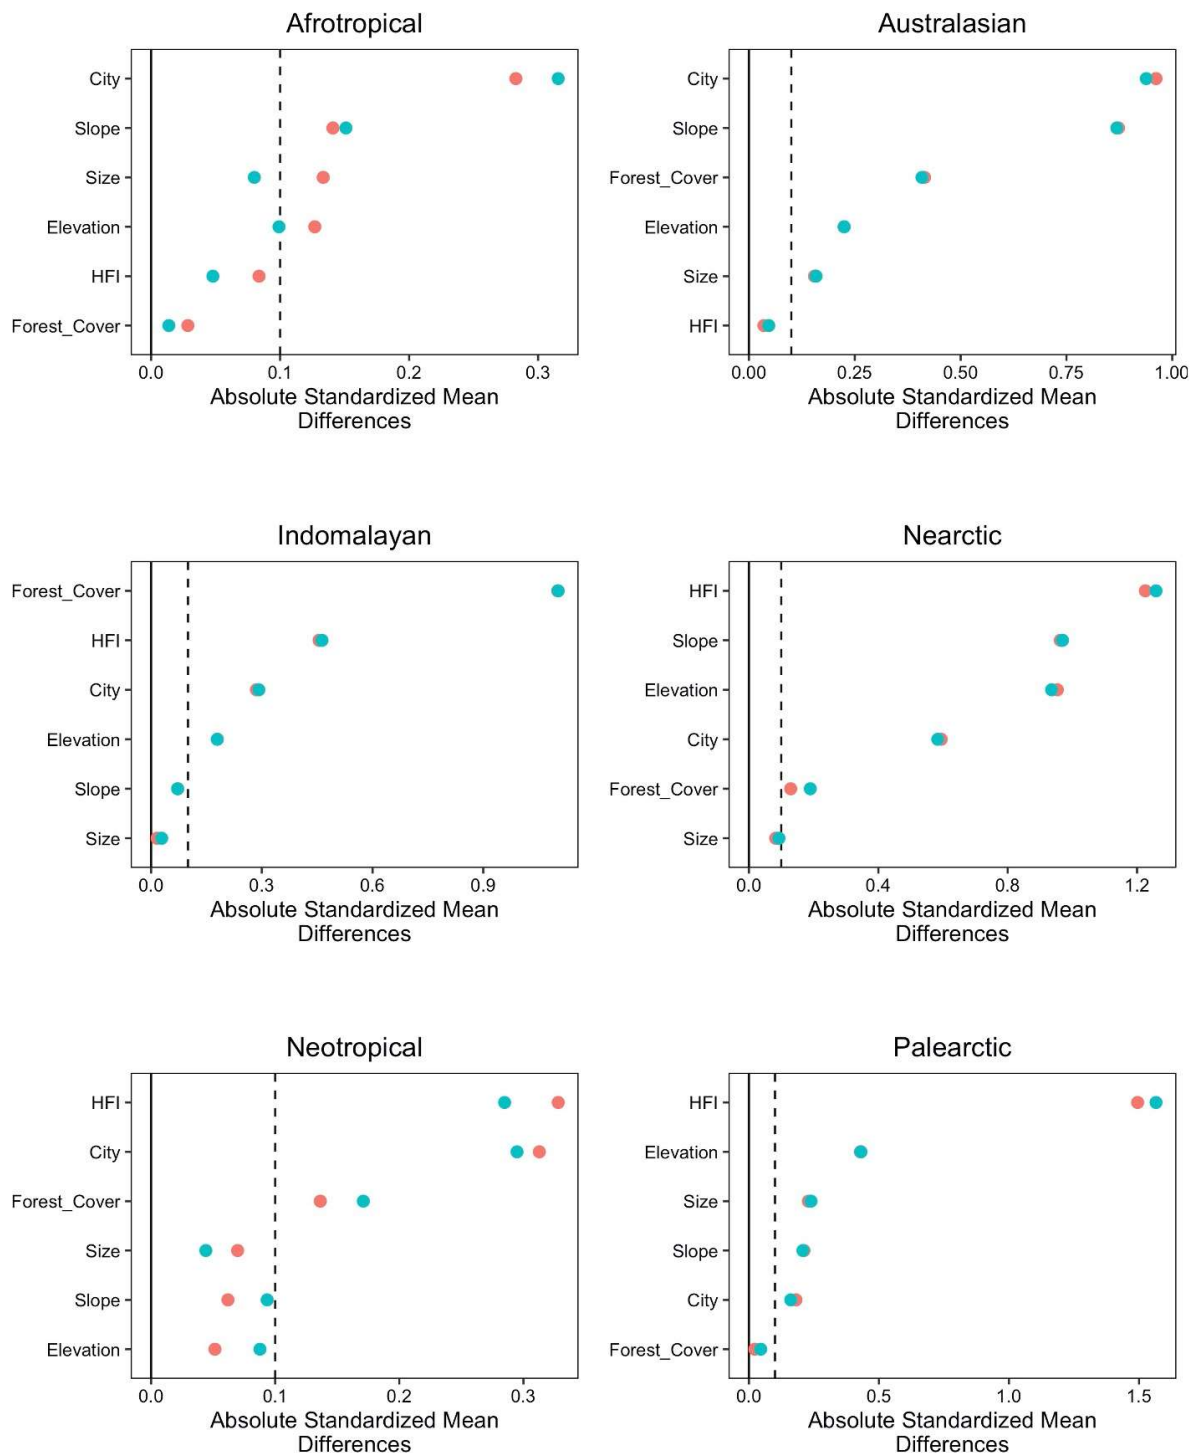

Supplement: 13280_2020_1426_MOESM1_ESM.pdf [file 13280_2020_1426_MOESM1_ESM.pdf]
